# Supplementary material
Source: publisher site journal article supplement (https://www.dovepress.com/get_supplementary_file.php?f=458928.docx)
Supplement: Supplementary file 1 [file get_supplementary_file.php]

**Supplementary files**

**Gut microbiota disorder contributes to the production of IL-17A that exerts chemotaxis via binding to IL-17RA in endometriosis**

Yangshuo Li1, *

Zhihao Zhou1, 2, *

Xiaolan Liang1, *

Jie Ding1

Yalun He1

Shuai Sun1

Wen Cheng1

Zhexin Ni1, 3, #

Chaoqin Yu1, #

*These authors contributed equally to this work

1Department of Traditional Chinese Gynecology, The First Affiliated Hospital of Naval Military Medical University (Changhai Hospital), Shanghai, China;

2Traditional Chinese Medicine Department, No. 929 Hospital, Naval Medical University, Shanghai, China;

3Department of Pharmaceutical Sciences, Beijing Institute of Radiation Medicine, Beijing 100850, China

**Figure S1 Flow cytometry gate strategy diagram for Th17 cells and Treg cells.**

**Figure S2 Single-cell sequencing analysis from EM patients and controls.** (A) UMAP down-plot of samples after Harmony integration. There were three samples of control in eutopic endometrium (C01-C03), and 11 samples of eutopic and ectopic endometrium from EM patients. (B) Distribution of cells based on tissue type was shown in UMAP after Harmony batch-corrected. (C) Violin plots of the expression levels of IL17/IL17R-related genes in different cell subpopulations.

**Figure S3 Expression levels of IL17 and IL17R-related genes.** (A)UMAP representation of IL17/IL17R-related gene expression in the global graph clustering. (B) UMAP downscaling plots of myeloid cell subpopulations in EcP and EcPA tissues. (C) Violin plots of the expression levels of IL17RA in myeloid cell subpopulations (monocytes, macrophages, dendritic cells, and mural cells). (D) UMAP representation of IL17RA+ (high) and IL17RA- (low) cell clusters in myeloid cell clusters in EcP and EcPA tissues.
